# Supplementary material
Source: PubMed Central journal article supplement (PMC8455254)
Supplement: ASN.2021020161SupplementaryData.pdf [file ASN.2021020161SupplementaryData.pdf]

## **Supplemental material**

- Patient cohorts and spent PD dialysate collection.
- Patient characteristics and antibody test results.

## **Patient cohorts and spent PD dialysate collection**

We analyzed spent PD dialysate samples from four distinct patient groups: Pre-pandemic chronic PD patients (Group 1; collected between May 2019 and Feb 2020); COVID-19 negative chronic PD patients (Group 2; collected during pandemic between March and September 2020); chronic PD patients with confirmed COVID-19 (Group 3; collected during pandemic between March and September 2020); and acute kidney injury patients with confirmed COVID-19 and treated with acute PD (Group 4; collected during pandemic in April 2020). Spent PD samples from patients in groups 1, 2 and 3 were collected during a quality improvement project that was approved by the respective clinic governing bodies after legal and compliance review. Samples from Group 1 were collected fully anonymized (no patient information available). While samples from Group 1 were collected locally, samples from Groups 2 and 3 were shipped overnight to the Renal Research Institute Laboratory with ice packs [1]. Group 4 samples were collected at the Mount Sinai Hospital, New York, NY in a clinical research project approved by the Icahn School of Medicine IRB [2,3]. All samples were stored at -80°C until antibody testing. All positive PD samples came from patients with positive nasopharyngeal swab test for SARS-CoV-2. Demographic and clinical data were obtained from the patients' electronic health records.

### Reference:

- 1 Wang X, Patel A, Tisdale L, Haq Z, Ye X, Lasky R, et al. SARS-CoV-2 in spent dialysate from chronic peritoneal dialysis patients with COVID-19. *Kidney360*. 2020 Dec;10.34067/KID.0006102020.
- 2 El Shamy O, Vassalotti JA, Sharma S, Aydillo-Gomez T, Marjanovic N, Ramos I, et al. Coronavirus disease 2019 (COVID-19) hospitalized patients with acute kidney injury treated with acute peritoneal dialysis do not have infectious peritoneal dialysis effluent. *Kidney Int*. 2020 Sep;98(3):782.
- 3 El Shamy O, Sharma S, Winston J, Uribarri J. Peritoneal Dialysis During the Coronavirus Disease-2019 (COVID-19) Pandemic: Acute Inpatient and Maintenance Outpatient Experiences. *Kidney Medicine*. 2020 Jul;2(4):377–80.

Patient characteristics and antibody test results.

|                                      | COVID-19 negative Controls                                  |                                                      | COVID-19 positive Cases            |                               |
|--------------------------------------|-------------------------------------------------------------|------------------------------------------------------|------------------------------------|-------------------------------|
|                                      | Group 1:<br>chronic PD<br>patients<br>(pre-COVID-19<br>era) | Group 2:<br>chronic PD<br>patients<br>(COVID-19 era) | Group 3:<br>chronic PD<br>patients | Group 4:<br>acute PD patients |
| <b>Patient characteristics</b>       |                                                             |                                                      |                                    |                               |
| Dates of sample collection           | May 2019 – February 2020                                    | March - September 2020                               | March - September 2020             | April 2020                    |
| Patient (n)                          | 15                                                          | 21                                                   | 11                                 | 11                            |
| Age [years]                          | not available                                               | 51±19                                                | 54±11                              | 59 ± 10                       |
| Males (n)                            | not available                                               | 10                                                   | 3                                  | 6                             |
| Time on PD [months]                  | not available                                               | 31.7±19.9 (9-84)                                     | 16.1±15.9 (1-58)                   | 0                             |
| PD modality (n)                      | not available                                               | CCPD (18)<br>CAPD (3)                                | CCPD (10)<br>CAPD (1)              | CCPD (11)                     |
| Hospitalized due to COVID-19 (n)     | None                                                        | None                                                 | 3                                  | 11                            |
| PD effluent sample count (n)         | 15                                                          | 33                                                   | 30                                 | 18                            |
| <b>Antibodies</b>                    |                                                             |                                                      |                                    |                               |
| IgG (ng/ml)                          | 1.5 (0.03-9.1)                                              | 3.8 (0.03-51)                                        | 422 (0.6-6019)                     | 1345 (9.4-6052)               |
| IgG-to-total protein ratio (x10,000) | 0.24 (0.001-1.5)                                            | 0.77 (0.009-16.5)                                    | 53 (0.06-656)                      | 134 (2.9-466)                 |
| Uncorrected total antibodies titer   | 184 (103-916)                                               | 327 (90-1143)                                        | 1526 (242-12839)                   | 3024 (310-54548)              |
| Corrected total antibodies titer     | 553 (226-1868)                                              | 784 (304-4924)                                       | 3947 (532-25439)                   | 15821 (5541-67584)            |

Patient characteristics are presented as mean ± standard deviation and range. Categorical variables are expressed as counts. Nucleocapsid IgG and IgG-to-protein ratios are presented as arithmetic mean (range). Uncorrected total antibodies titer and corrected total antibodies titer are presented as geometric mean (range). CAPD, continuous ambulatory peritoneal dialysis; CCPD, continuous cycling peritoneal dialysis.
